# Supplementary material
Source: Springer Nature journal article supplement (https://www.springermedizin.de/resource/supplementary/13058_2013_3439_MOESM2_ESM.pdf/9703552)

# Endogenous Estrogen Metabolism

Parent EM

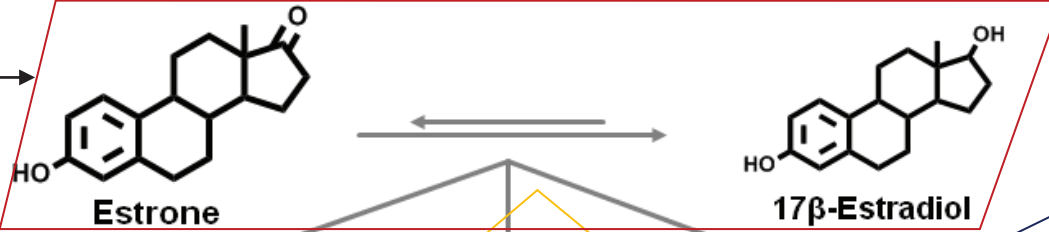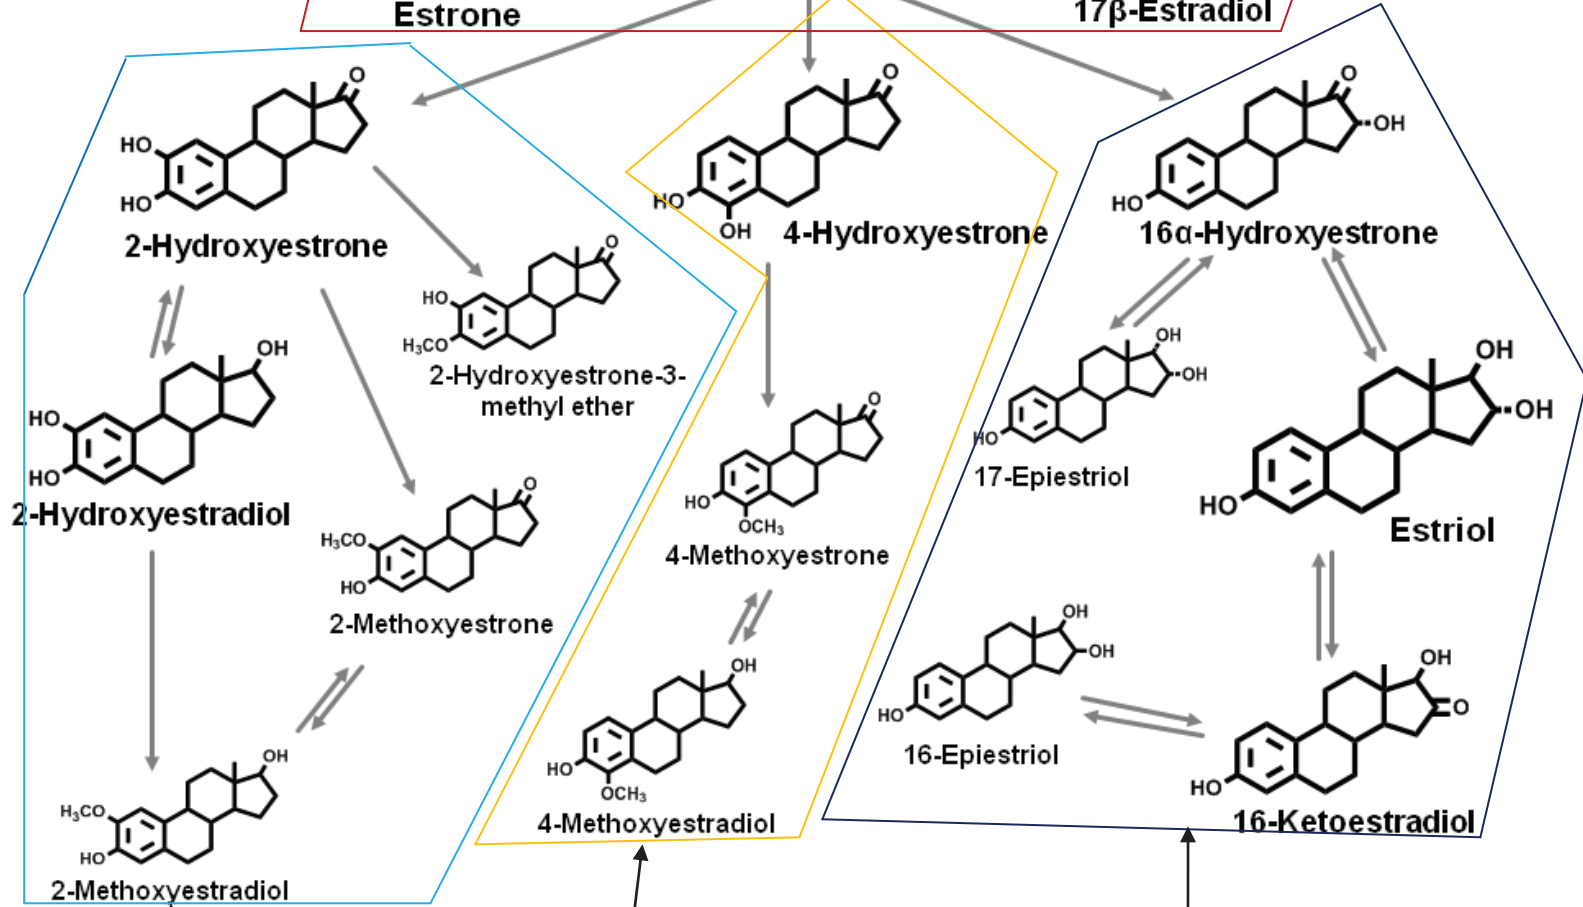

2-Pathway

4-Pathway

16-Pathway

Supplement: MOESM2 [file 9703552]
